# Supplementary material for: Tandem electroreduction of nitrate to green ammonia on recycled copper sheets from spent batteries: splicing surface roughness achieves high yield rate
Source: Royal Society of Chemistry journal article supplement (doi:10.1039/d4se00700j), 2024-01-01
Supplement: d4se00700j1.pdf [file d4se00700j1.pdf]

## Supporting Information

# Tandem Electroreduction of Nitrate to Green Ammonia on Recycled Copper Sheets from Spent Batteries: Splicing the Surface Roughness Achieves High Yield Rate

*Abdelrahman M. Abdelmohsen<sup>§</sup>, Ahmed M. Agour<sup>§</sup>, Ibrahim M. Badawy, Ghada E. Khedr, Yasmine Mesbah and Nageh K. Allam\**

Energy Materials Laboratory (EML), Physics Department, School of Sciences and Engineering,  
The American University in Cairo, New Cairo 11835, Egypt

\* Corresponding Author's email: [nageh.allam@aucegypt.edu](mailto:nageh.allam@aucegypt.edu)

### Reagents.

Sodium hydroxide (NaOH, 96%), potassium hydroxide (KOH, ≥85%) and Hydrochloric acid (HCl, 37%) were purchased from Sigma-Aldrich. Urea and Absolute ethanol were purchased from Merck. Ferric nitrate nonahydrate ( $\text{FeN}_3\text{O}_{9,9}\text{H}_2\text{O}\cdot 4\text{H}_2\text{O}$ , ≥98.0%), were purchased from Alfa Aesar. Ammonium chloride ( $\text{NH}_4\text{Cl}$ , ≥98%) was purchased from Fischer. Trisodium citrate, Citric acid ( $\text{C}_8\text{H}_8\text{O}_7$ , 99.5%), and Salicylic acid ( $\text{C}_7\text{H}_6\text{O}_3$ , 99%) were purchased from Loba Chemie. Sodium nitroferricyanide ( $\text{Na}_2[\text{Fe}(\text{CN})_5\text{NO}]\cdot 2\text{H}_2\text{O}$ , 99%) was purchased from Alpha Chemika. Sodium hypochlorite (NaOCl, approx. 4%w/v) was purchased from SDDFCL. P Dimethyl Amino Benzaldehyde ( $\text{C}_9\text{H}_{11}\text{NO}$ , 98%) was purchased from Qualikems.

## Characterization.

XRD patterns of the obtained powders were performed using a D8 Discover (Bruker). Scanning electron microscopy (SEM) and energy-dispersive X-ray spectrometer (EDS) elemental mapping were conducted using a Thermo Fisher (USA) Quattro S Felid Emission Gun, Environmental SEM “FEG ESEM” and energy-dispersive X-ray spectrometer (EDS) elemental mapping were conducted on a JEM-ARM 200F. Ultraviolet-visible (UV-vis) spectra were carried out on a SHIMADZU UV-2700 UV-vis spectrophotometer. FTIR spectroscopy on a Nicolet 380 spectrometer (Thermo Scientific Nicolet, Waltham, MA, USA).

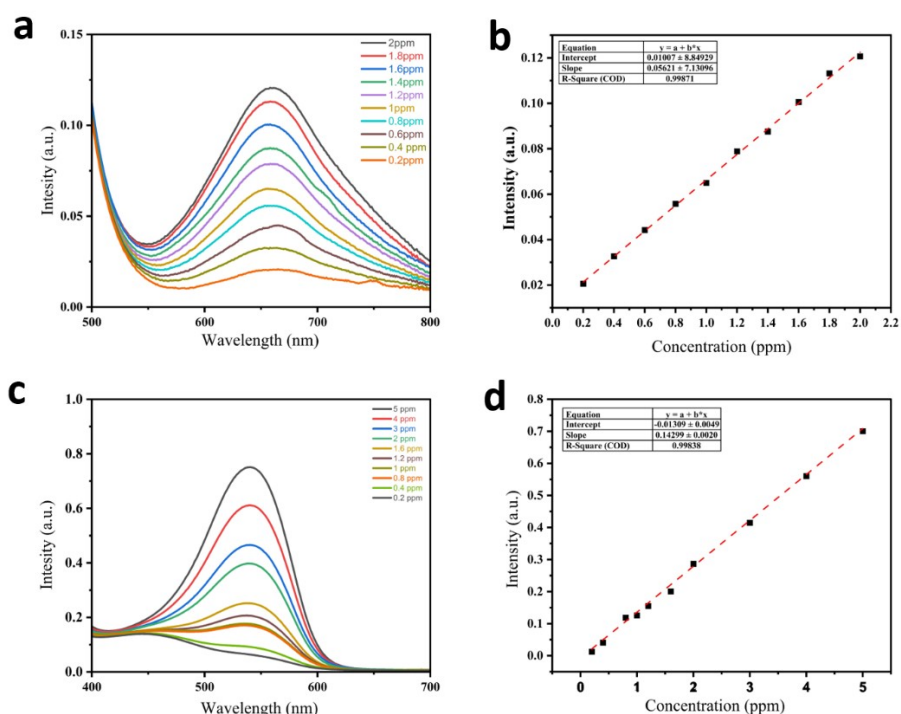

**Figure S1.** (a) UV-Vis spectrum of NH<sub>4</sub>OH with different concentrations with the as-prepared indicator, (b) the corresponding calibration curve, (c) the UV-Vis spectrum of potassium nitrite with the as-prepared indicator, and (d) the corresponding calibration curve.

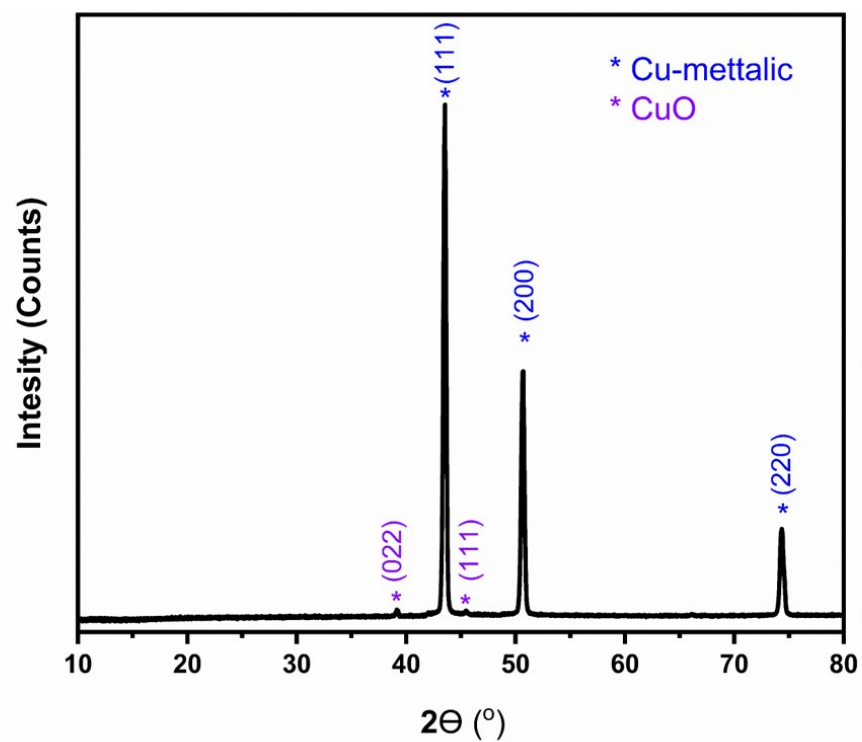

**Figure S2.** XRD pattern of the bare Cu-foil

**Table S1.** Elemental composition of the bare Cu-foil as revealed from the XRF analysis

| Element | Cu (%) | Na (%) | Mg (%) | Al (%) |
|---------|--------|--------|--------|--------|
| Percent | 98.41  | 0.94   | 0.17   | 0.014  |

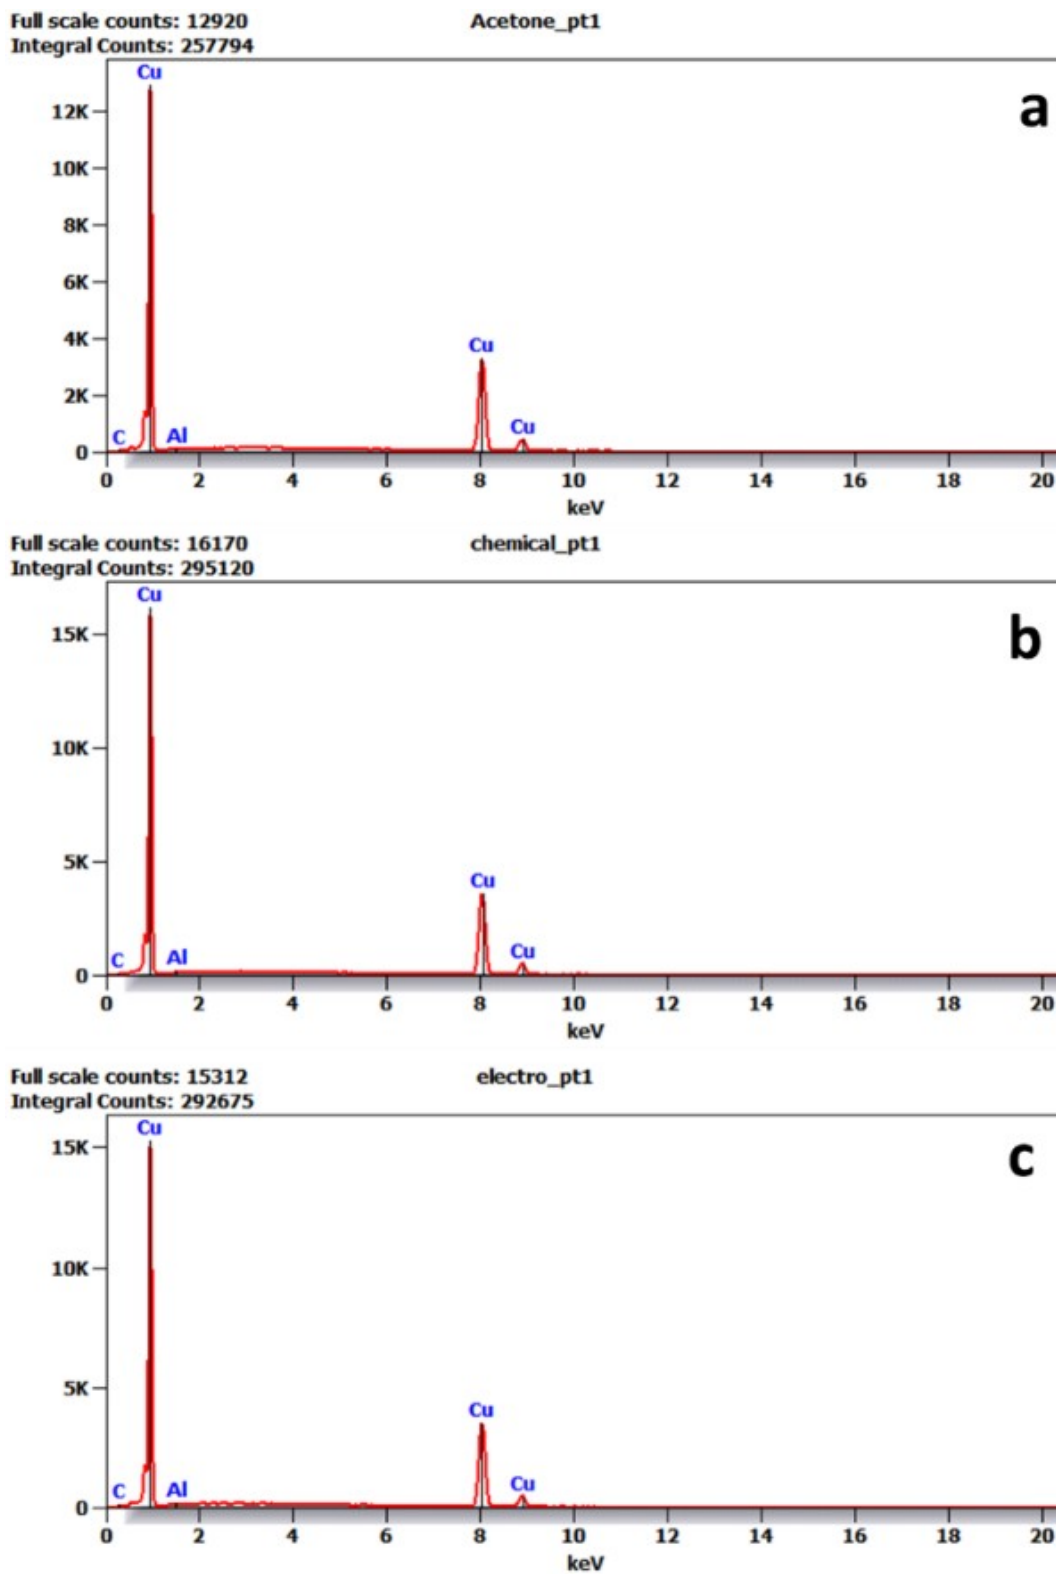

**Figure S3** EDX spectra of the (a) acetone-treated, (b) acid-treated, and (c) electropolished Cu-foil samples.

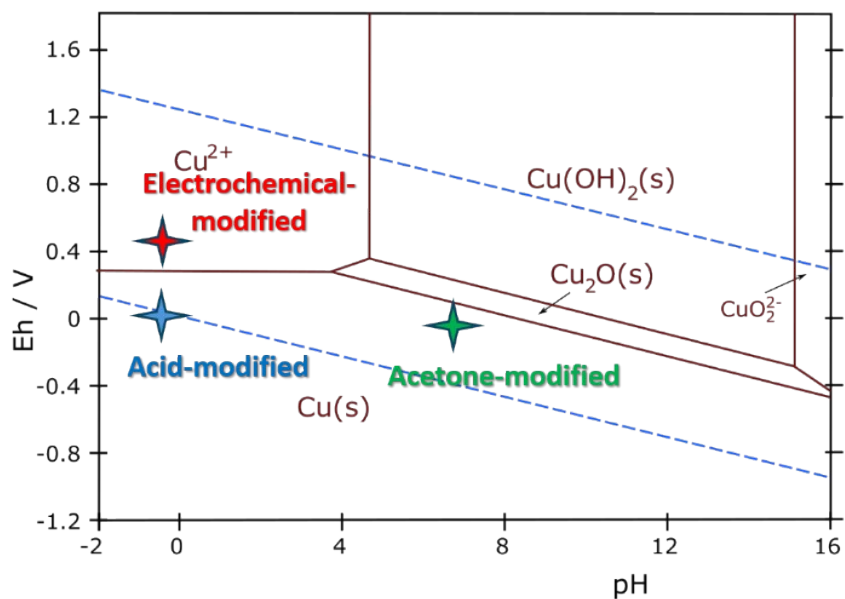

Figure S4. Pourbaix diagram of Cu.

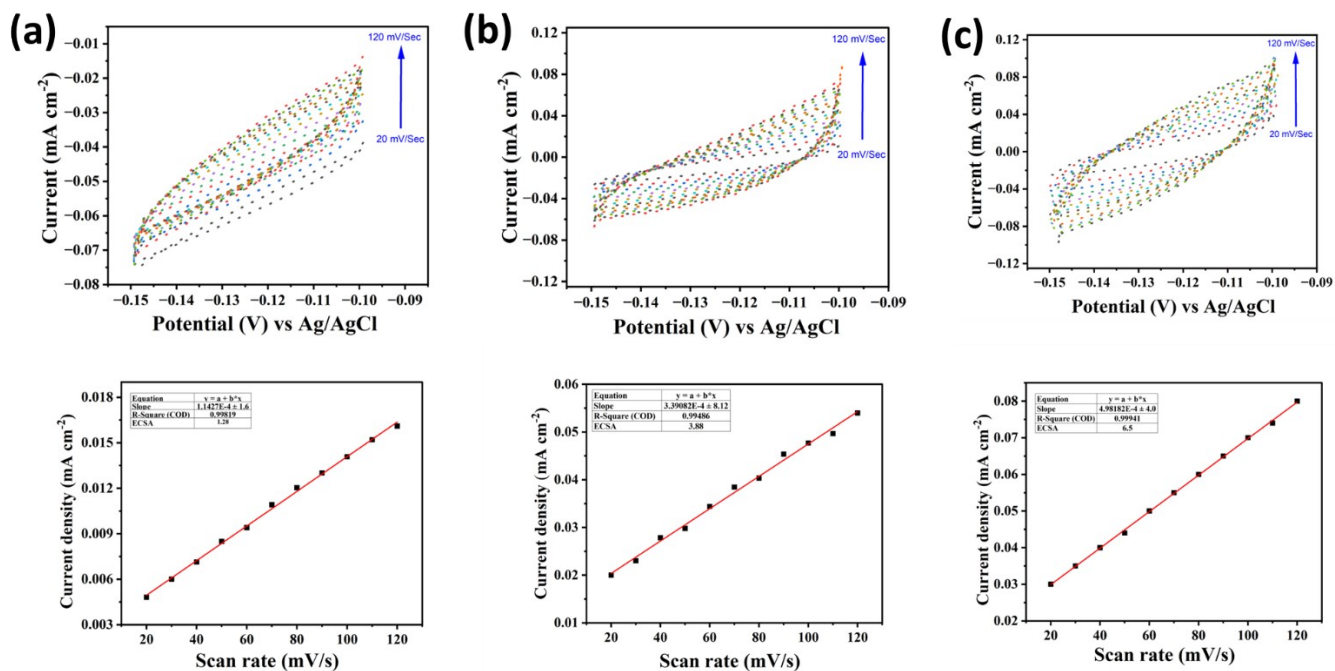

Figure S5. Cyclic voltammograms of Cu-foil measured at different scan rates from 20 to 120 mV/s. a) The CVs for acetone treated sample (top) and the linear best-fit line of  $C_{dl}$  (bottom) b) CVs (top) and best linear fit (bottom) for acid-treated sample c) CVs (top) and best linear fit (bottom) for electropolished sample

### Computational details:

The equations applied for  $\text{NO}_3^-$  conversion to  $\text{NH}_3$  are as follows:

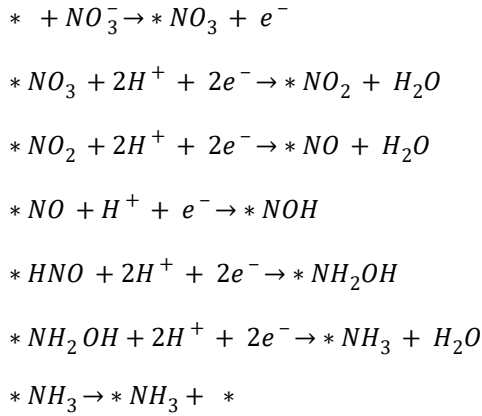

where \* represents the surface. Then, the reaction Gibbs free energy change can be calculated by the following equation:

$$\Delta G = \Delta E + \Delta ZPE - T\Delta S$$

where  $\Delta E$  is the total energy difference before and after intermediate adsorbed,  $\Delta E_{ZPE}$  and  $\Delta S$  are the differences of zero-point energy and entropy, respectively. The vibrational frequency calculations were applied to calculate the zero-point energy and entropy of free molecules and adsorbents. To avoid directly computing the energy of charged  $\text{NO}_3^-$ , gaseous  $\text{HNO}_3$  is used as a reference in the following steps. Correspondingly, the adsorption energy of  $\text{NO}_3^-$

( $\Delta G^*_{\text{NO}_3}$ ) can be approximately calculated as

$$\Delta G^* \text{NO}_3 = G^* \text{NO}_3 - G^* - G_{\text{HNO}_3(g)} + 0.5G_{\text{H}_2(g)}$$

where  $G^*_{\text{NO}_3}$ ,  $G^*$ ,  $G_{\text{HNO}_3(g)}$  and  $G_{\text{H}_2}$  are the Gibbs free energy of  $\text{NO}_3^-$  adsorbed,  $\text{HNO}_3$  and  $\text{H}_2$  molecules in the gas phase, respectively. The HER catalytic activity of catalysts can be evaluated by  $\Delta G_{\text{H}}$ , which is defined as were calculated based on.

$$\Delta E = E_{\text{surf} + \text{H}} - E_{\text{surf}} - \frac{1}{2}E(\text{H}_2)$$

The Gibbs free energy of Hydrogen is calculated using:

$$\Delta G = \Delta E + \Delta ZPE - T\Delta S$$

$\Delta ZPE$  is the difference in zero-point energy and  $\Delta S$  is the difference in entropy between the adsorbed state and gas phase. Since  $\Delta ZPE - T\Delta S \approx 0.24$  eV, thus  $\Delta G = \Delta E + 0.24$  eV.

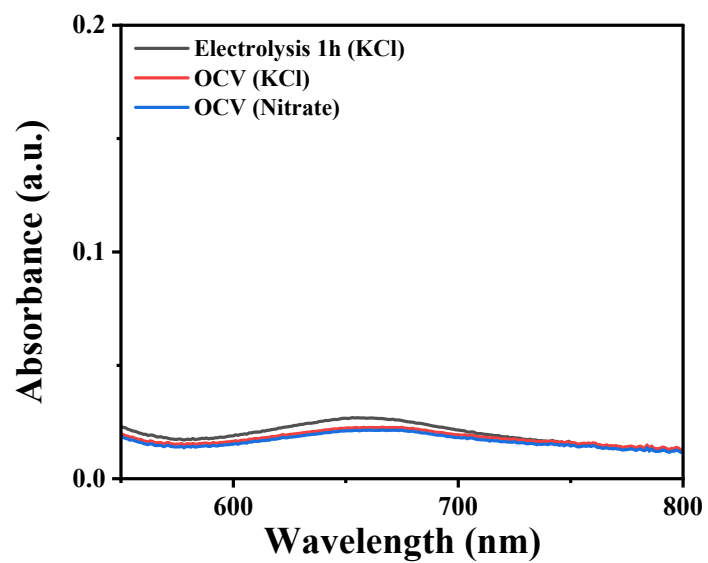

Figure S6. Control experiment

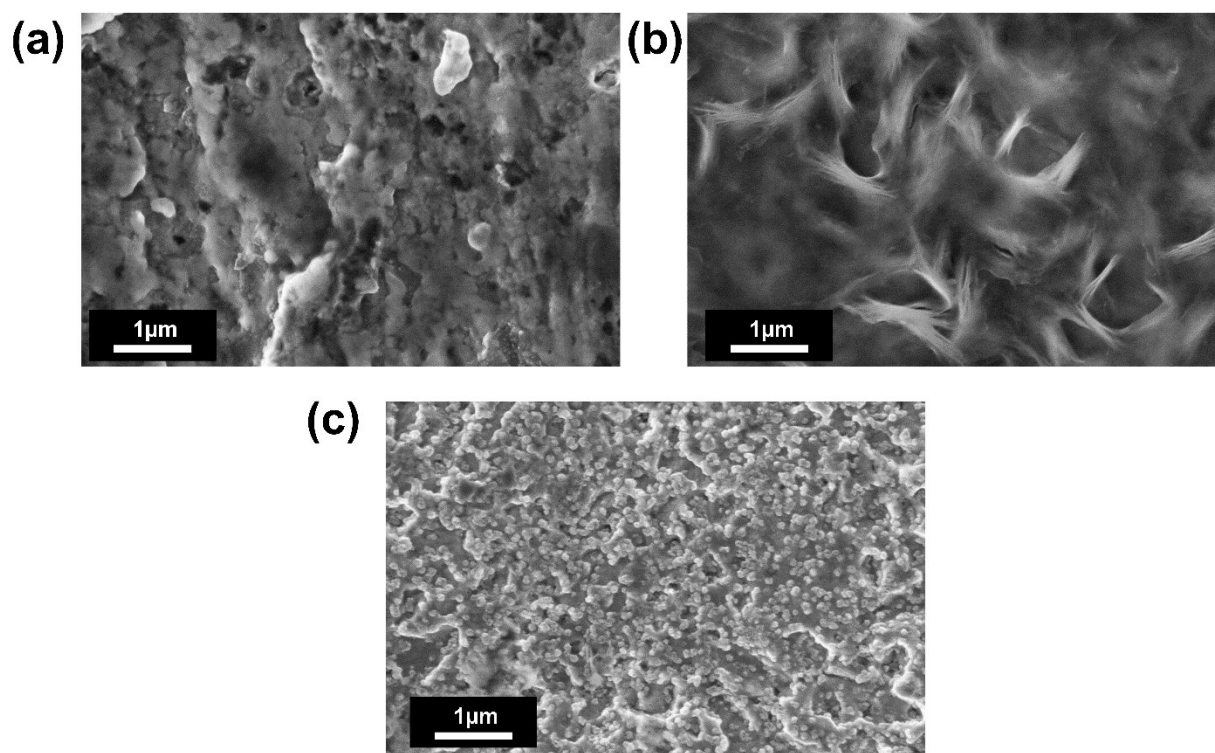

Figure S7. SEM images of a) acetone treated b) acid treated and c) electropolished Cu sheets after a complete electrochemical run under  $-0.8\text{V}$  vs RHE

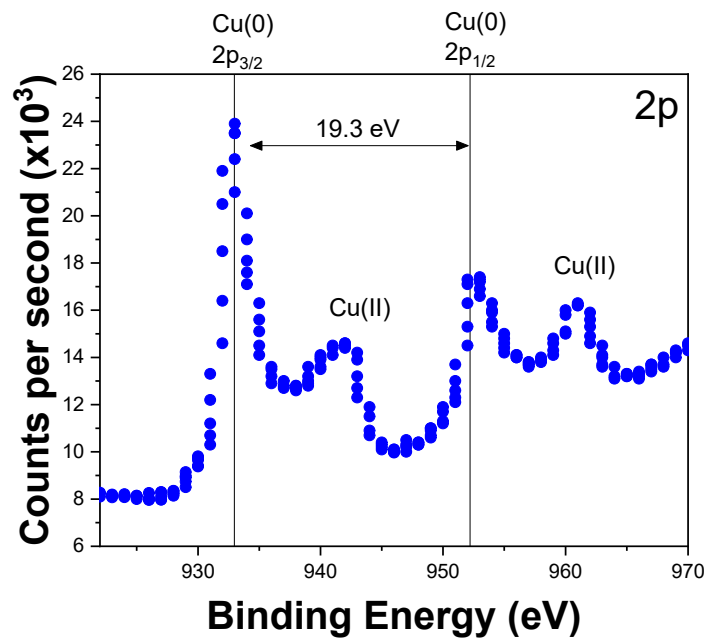

**Figure S8.** XPS spectra of the electropolished Cu sheet
